# Supplementary material for: Contrasting Asymptomatic and Drug Resistance Gene Prevalence of Plasmodium falciparum in Ghana: Implications on Seasonal Malaria Chemoprevention
Source: MDPI journal article supplement (doi:10.3390/genes10070538), 2019-07-16
Supplement: s1 [file s1]

# Supplementary Materials: Contrasting Asymptomatic and Drug Resistance Gene Prevalence of *Plasmodium falciparum* in Ghana: Implications on Seasonal Malaria Chemoprevention

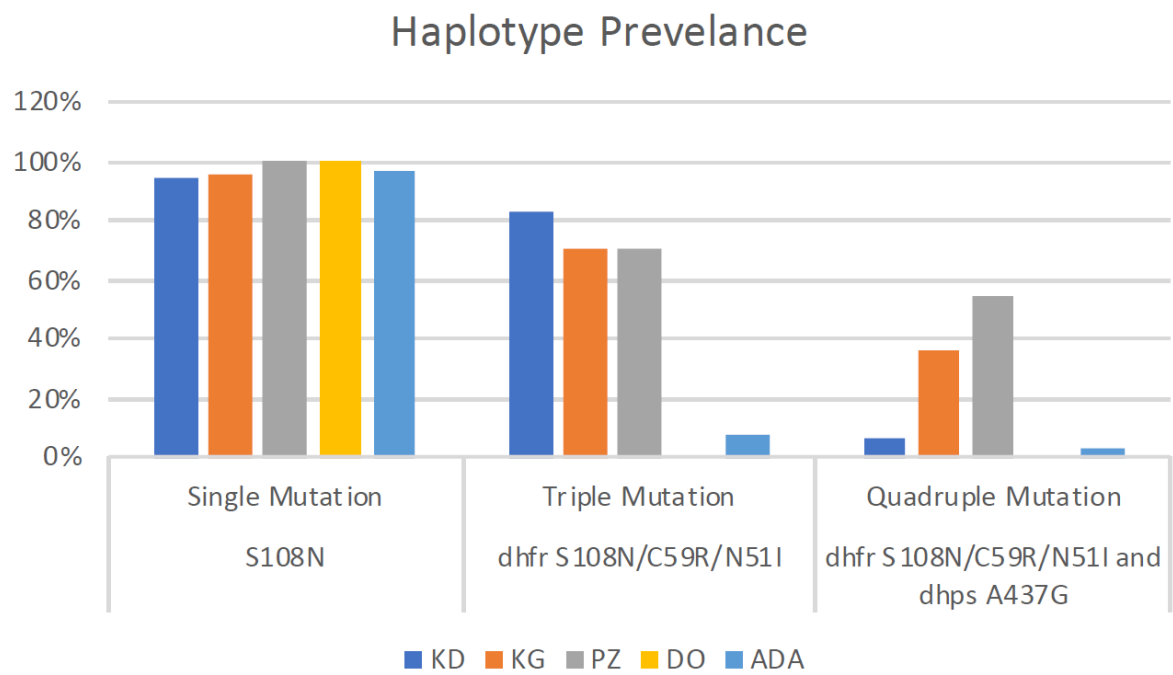

**Figure S1.** Percentage of single, triple, and quadruple mutations of *pfdhfr* and *pfdhps* among *P. falciparum* samples from respective sites in Ghana.

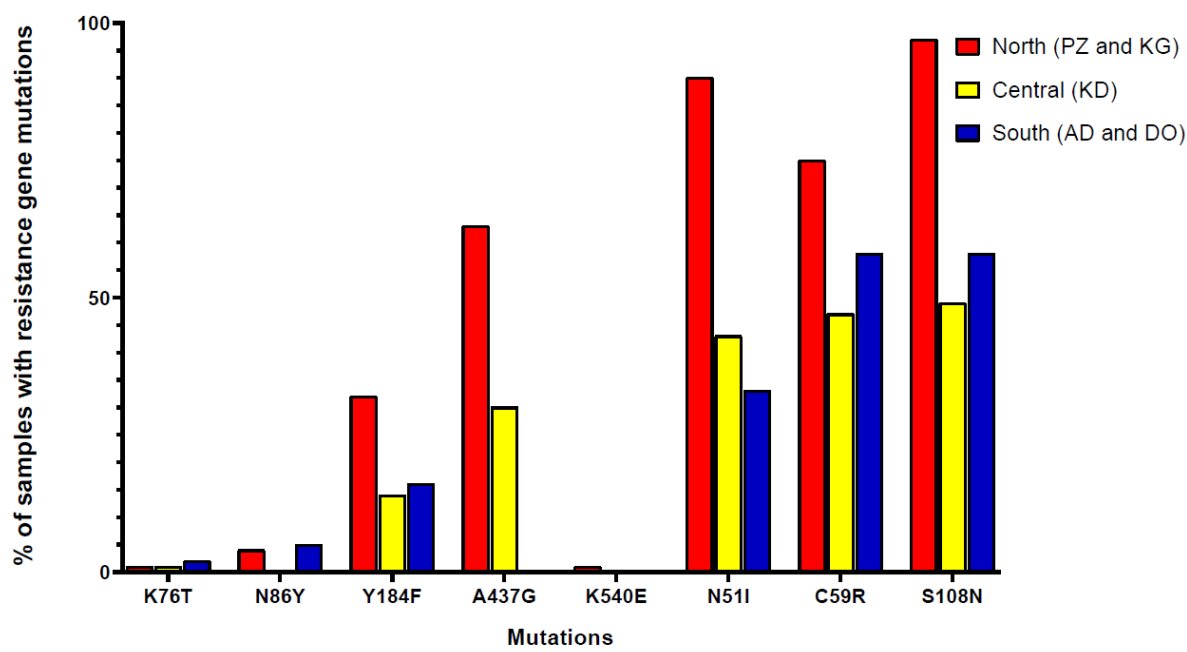

**Figure S2.** Percentage of *P. falciparum* samples that showed mutations in the respective resistance gene codons.

**Table S1.** Primers and PCR conditions for *P. falciparum* resistance gene amplifications.

| Primers                                                           | Sequence<br>F 5'>3'<br>R 5'>3'                                      | Expected Band Size | PCR Conditions                                                                                                                                                              | Reference             |
|-------------------------------------------------------------------|---------------------------------------------------------------------|--------------------|-----------------------------------------------------------------------------------------------------------------------------------------------------------------------------|-----------------------|
| Genes related to AQ (amodiaquine) and CQ (chloroquine) resistance |                                                                     |                    |                                                                                                                                                                             |                       |
| crt-K76T                                                          | GGCTCACGTTTAGGTGGA<br><br>TGAATTTCCCTTTTATTTCAAA                    | 264 bp             | 95°C for 5:00<br>95°C for 00:30<br>50°C for 01:30<br>72°C for 01:30<br>Go to step2 34 times<br>72°C for 5:00<br>10°C for infinite                                           | Vathsala et al 2004   |
| mdr1-N86Y                                                         | ATGGGTAAAGAGCAGAAAGA<br><br>AACGCAAGTAATACATAAAGTCA                 | 603 bp             | 95°C for 5:00<br>95°C for 00:30<br>52°C for 01:30<br>72°C for 01:30<br>Go to step2 34 times<br>72°C for 5:00<br>10°C for infinite                                           | Vathsala et al 2004   |
| Genes related to SP (sulfadoxine-pyrimethamine) resistance        |                                                                     |                    |                                                                                                                                                                             |                       |
| dhfr-nested2a                                                     | TTTATGATGGAACAAGTCTGCGACGTT<br><br>AAATTCTTGATAAACACGGAACCTtTA      | 450 bp             | 94°C for 3:00<br>94°C for 1:00<br>57°C for 01:00<br>72°C for 01:00<br>Go to step2 39 times<br>72°C for 10:00<br>10°C for infinite                                           | Duraisingh et al 1998 |
| dhps-nested1                                                      | AACCTAACGTGCTGTTCAA<br><br>AATTGTGTGATTGTCCACAA                     | 600 bp             | 95°C for 5:00<br>95°C for 00:30<br>52°C for 01:30<br>72°C for 01:30<br>Go to step2 34 times<br>72°C for 5:00<br>10°C for infinite                                           | Duraisingh et al 1998 |
| Sensitivity and Specificity                                       |                                                                     |                    |                                                                                                                                                                             |                       |
| PCR 18s                                                           | TTAAACTGGTTTGGGAAAACCAATATATT<br><br>ACACAATGAACTCAATCATGACTACCCGTC | 206                | 95°C for 5:00<br>95°C for 00:30<br>58°C for 01:30<br>72°C for 01:00<br>Go to Step2 35 times<br>72°C for 05:00                                                               | Wang et al 2014       |
| qPCR 18s                                                          | AGTCATCTTTCGAGGTGACTTTTAGATTGCT<br><br>GCCGCAAGCTCCACGCTGGTGGTGTC   | -                  | 95°C for 03:00<br>94°C for 00:30<br>68°C for 01:00<br>95°C for 00:10<br>Got to step2 45 times<br>**melting curve from<br>65°C to 95°C with<br>0.5°C increments for<br>00:05 | Baum et al 2015       |
| SYBR-TARE                                                         | ctatgttgacattacatgcayaat<br><br>tgacctaagaagtavaataatgatga          | -                  | 50°C for 2:00<br>95°C for 10:00<br>95°C for 00:15<br>57°C for 01:00<br>Go to Step2 45 times<br>10°C for infinite                                                            | Hofmann et al 2014    |

**Table S2.** Information of *P. falciparum* samples collected in each of the study sites in Ghana.

| <b>SITE</b>                      | <b>SEASON</b> | <b>NO. OF CHILDREN SCREENED</b> | <b>Microscopy Positives<br/>(Prevalence %)</b> | <b>NESTED 18s PCR Positives<br/>(Prevalence %)</b> |
|----------------------------------|---------------|---------------------------------|------------------------------------------------|----------------------------------------------------|
| KONONGO                          | WET           | 216                             | 52<br>(24.07%)                                 | 60<br>(27.78%)                                     |
| ADA                              | WET           | 148                             | 19<br>(12.84%)                                 | 25<br>(16.89%)                                     |
| KUMBUNGU,KPASOLGU, NAVRONGO      | WET           | 65                              | 12<br>(18.46%)                                 | 25<br>(38.46%)                                     |
| PAGAZA,TAMALE                    | WET           | 47                              | 12<br>(25.53%)                                 | 33<br>(70.21%)                                     |
| DODOWA                           | WET           | 59                              | 10<br>(16.95%)                                 | 10<br>(16.95%)                                     |
| <b>Total Number of Positives</b> |               | 535                             | 105                                            | 153                                                |
